1 **Long-read sequencing reveals widespread intragenic structural variants in a recent**  
2 **allopolyploid crop plant**

3

4

5 Harmeet Singh Chawla<sup>1</sup>, HueyTyng Lee<sup>1</sup>, Iulian Gabur<sup>1</sup>, Suriya Tamilselvan-Nattar-  
6 Amutha<sup>1</sup>, Christian Obermeier<sup>1</sup>, Sarah V. Schiessl<sup>1</sup>, Jia-Ming Song<sup>2</sup>, Kede Liu<sup>2</sup>, Liang Guo<sup>2</sup>,  
7 Isobel A. P. Parkin<sup>3</sup>, Rod J. Snowdon<sup>1\*</sup>

8

9

10 <sup>1</sup> Department of Plant Breeding, Justus Liebig University, Heinrich-Buff-Ring 26-32, 35392  
11 Giessen, Germany

12

13 <sup>2</sup> National Key Laboratory of Crop Genetic Improvement, Huazhong Agricultural University,  
14 Wuhan, China

15

16 <sup>3</sup> Agriculture and Agri-Food Canada, 107 Science Place, Saskatoon, SK S7N 0X2, Canada

17

18 \* Correspondence: Rod Snowdon

19 Email: [rod.snowdon@agr.uni-giessen.de](mailto:rod.snowdon@agr.uni-giessen.de)

20 Phone: +49 641 9937420

21

22

## 23 **Summary**

24 Genome structural variation (SV) contributes strongly to trait variation in eukaryotic species  
25 and may have an even higher functional significance than single nucleotide polymorphism  
26 (SNP). In recent years there have been a number of studies associating large, chromosomal  
27 scale SV ranging from hundreds of kilobases all the way up to a few megabases to key  
28 agronomic traits in plant genomes. However, there have been little or no efforts towards  
29 cataloging small (30 to 10,000 bp) to mid-scale (10,000 bp to 30,000 bp) SV and their impact  
30 on evolution and adaptation related traits in plants. This might be attributed to complex and  
31 highly-duplicated nature of plant genomes, which makes them difficult to assess using high-  
32 throughput genome screening methods. Here we describe how long-read sequencing  
33 technologies can overcome this problem, revealing a surprisingly high level of widespread,  
34 small to mid-scale SV in a major allopolyploid crop species, *Brassica napus*. We found that  
35 up to 10% of all genes were affected by small to mid-scale SV events. Nearly half of these  
36 SV events ranged between 100 bp to 1000 bp, which makes them challenging to detect using  
37 short read Illumina sequencing. Examples demonstrating the contribution of such SV towards  
38 eco-geographical adaptation and disease resistance in oilseed rape suggest that revisiting  
39 complex plant genomes using medium-coverage, long-read sequencing might reveal  
40 unexpected levels of functional gene variation, with major implications for trait regulation  
41 and crop improvement.

42

## 43 **Introduction**

44 The recent allopolyploid species *Brassica napus* L. (oilseed rape/canola/kale/rutabaga;  
45 genome AACC,  $2n=38$ ) evolved rapidly into a globally important crop. Genome assembly  
46 and resequencing of *B. napus* (Chalhoub et al. 2014) revealed a highly complex and strongly  
47 duplicated genome with an unexpected extent of segmental exchanges among homoeologous  
48 chromosomes. In synthetic *B. napus* accessions, genome structural variants frequently span  
49 whole chromosomes or chromosome arms (Chalhoub et al. 2014, Samans et al. 2017).  
50 Naturally formed *B. napus* also shows widespread homoeologous exchanges, with similar  
51 distribution patterns (Hurgobin et al., 2018; Samans et al., 2017), that apparently arose during  
52 the allopolyploidisation process (Leflon et al., 2006; Nicolas et al., 2007; Szadkowski et al.,  
53 2010). The wide extent of segmental deletion/duplication events in both synthetic and natural  
54 *B. napus* has been confirmed using other genome-wide analysis methods, for example

55 visualization based on mRNAseq data (He et al., 2017) or deletion calling from SNP array  
56 data (Gabur et al., 2018; Grandke et al., 2016). Critically, numerous examples have  
57 connected genome SV in *B. napus* to important agronomic traits (Gabur et al., 2018; Gabur et  
58 al., 2019; Liu et al., 2012; Stein et al., 2017). These studies revealed the important role of SV  
59 in the creation of *de novo* variation for adaptation and breeding, however the methods used  
60 were not yet capable of resolving SV at gene scale.

61 A first example of intragenic SV impacting quantitatively inherited traits in *B. napus* was  
62 reported by Qian et al. (2016), who demonstrated that deletion of exons 2 and 3 from a *B.*  
63 *napus* orthologue of Mendel's "Green Cotyledon" gene (the Staygreen gene *NON-*  
64 *YELLOWING 1*; *NYE1*) associated with quantitative variation for chlorophyll and oil content.  
65 Unfortunately, such small deletions are challenging to reliably detect using short-read  
66 sequencing or low-cost marker arrays, so that their genome-wide extent could not yet be  
67 investigated in detail. In this study, using *B. napus* as an example for a plant genome with  
68 widespread structural variation, we demonstrate the power of whole-genome long-read  
69 sequencing for high-resolution detection of intragenic SV. The results reveal widespread  
70 functional variation on a completely unexpected scale, suggesting that small to mid-scale SV  
71 may be a major driver of functional gene diversity in this recent polyploid crop. With the  
72 growing accessibility, accuracy and cost-effectiveness of long-read sequencing, our results  
73 suggest that there could be enormous promise in revisiting complex crop genomes to discover  
74 potentially novel functional SV which has previously been overlooked.

75

## 76 **Results and discussions**

### 77 **Long read sequencing reveal novel SV diversity in *B. napus***

78 We sequenced 4 *B. napus* accessions with long reads using the Oxford Nanopore Technology  
79 (ONT) and 8 further accessions using the Pacific Biosciences (PacBio) platform (obtained  
80 from Song et al. (2020)). The genotype panel included three vernalisation-dependent winter-  
81 type accessions, 3 vernalisation-independent spring-type accessions, 4 semi-winter  
82 accessions and 2 synthetic *B. napus* accessions (a winter-type and a spring-type). All  
83 accessions were sequenced to between ~30x and ~50x whole-genome coverage (between 30  
84 and 50 Gb of data). Reads were aligned to the *B. napus* Darmor-*bzh* version 4.1 reference  
85 genome (Chalhoub et al., 2014) using the long-read aligner NGMLR  
86 (<https://github.com/philres/ngmlr>) (Sedlazeck et al., 2018) and called for genome-wide SV

87 using the SV-calling algorithm Sniffles (Sedlazeck et al., 2018). N50 values ranging from  
88 10,552 to 15,369 bp were obtained for the 8 PacBio datasets, while in the 4 ONT datasets the  
89 N50 ranged from 10,756 to 28,916 bp (Table 1, Supplementary Table S1). After aligning to  
90 the Darmor-*bzh* v4.1 reference genome, the total number of SV events called by Sniffles  
91 ranged from 51,463 to 108,335. To minimise false-positive calls derived from reference mis-  
92 assemblies, we followed a highly stringent quality-filtering approach (details in  
93 Supplementary Materials) that removed 54.4-59.4% of the total predicted SV. This procedure  
94 resulted in a final set of 27,107 to 44,516 high-quality SV events (Table 1). To evaluate the  
95 impact of assembly errors on SV calling rates, we compared results after aligning (using the  
96 same procedure) to a pseudo-reference constructed by combining the high-quality long-read  
97 reference assemblies of *Brassica rapa* (A subgenome) and *Brassica oleracea* (C subgenome)  
98 published recently by Belser et al. (2018). Using this pseudo-reference assembly we detected  
99 between 41,436 and 50,907 quality filtered SV across the 12 *B. napus* genotypes. There are  
100 two possible explanations for the higher number of SV. Firstly, the pseudo-reference  
101 assembly (957 Mbp) is nearly 10 percent larger than the *B. napus* Darmor-*bzh* v4.1 reference  
102 (849.7 Mbp). Secondly, SV detected using the pseudo-reference assembly will also reflect  
103 genomic differences between the unknown diploid progenitors of *B. napus* and the two  
104 diploid genotypes from which this pseudo-assembly was generated. To further validate our  
105 SV detection approach, we therefore compared the number of SV per megabase, detected  
106 using the two different genome assemblies for each of the 19 chromosomes across 12  
107 genotypes. This showed a correspondence of 77.08 percent, suggesting that the latter may be  
108 the predominant cause.

109 After alignment to the Darmor-*bzh* v4.1 reference genome, the median detected SV size  
110 across the 12 accessions ranged from 296 bp to 584 bp. The spring-type accessions N99 and  
111 PAK85912 had the largest median SV size (509 and 584 bp, respectively), which might be  
112 attributable to the longer read lengths for these two genotypes (N50 = 27,139 bp and 28,916  
113 bp, respectively) (Figure 1A). The largest SV event (34,848 bp) was also detected in the  
114 spring-type accession N99, suggesting that read length plays a critical role in the ability to  
115 detect large and complex SV events. Around half of all detected, high-confidence SV events  
116 (46.8 to 53.2 % across the 12 genotypes) ranged in size from ~100-1000 bp (Supplementary  
117 Table S2). These small SV represent a novel genetic diversity resource that was previously  
118 unnoticed due to the insufficient resolution of high-throughput genotyping platforms such as

119 SNP genotyping arrays and a very high false-positive rates (up to 89%) of short-read  
120 sequencing data (Mahmoud et al., 2019; Sedlazeck et al., 2018).

121

### 122 **Subgenomic differences in SV frequency**

123 Comparison of subgenomic SV frequency revealed significantly higher numbers of small- to  
124 mid-scale SV per megabase in the *B. napus* A subgenome than the C subgenome in all twelve  
125 analysed genotypes (Figure 6 A and B, Supplementary Table S4). This reflects a  
126 corresponding subgenomic bias also observed for large-scale SV in *B. napus* (Samans et al.  
127 2017), this could also be attributable to repeated introgressions from the A genome of *B. rapa*  
128 during the breeding history of *B. napus* (Lu et al., 2019). Samans et al. (2017) reported a  
129 significant enrichment for large-scale segmental deletions in the C-subgenome of *B. napus*  
130 resulting from homoeologous exchanges. In contrast, we observed no bias for small to mid-  
131 scale deletions in the C-subgenome of the 12 sequenced *B. napus* accessions (Supplementary  
132 table S6). This indicates that a different molecular mechanism may be responsible for the  
133 generation of large and small to mid-scale SV events in the rapeseed genome. Unexpectedly,  
134 we found that between 5% (Express 617) and 10% (No2127) of all genes detected in the  
135 twelve accessions were affected by small to mid-scale SV events. This represents a  
136 previously completely unknown extent of functional gene modification as a result of post-  
137 polyploidisation genome restructuring. It also underlines the massive selection potential  
138 arising from intergenomic disruption during the act of allopolyploidisation (Nicolas et al.,  
139 2007; Nicolas et al., 2008; Szadkowski et al., 2010), and the great significance of post-  
140 polyploidisation intergenomic restructuring for polyploid crop evolution (Samans et al.,  
141 2017).

142

### 143 **Small to mid-scale SV underlining eco-geographical differentiation in *B. napus***

144 As expected, strong SV differentiation from the winter-type oilseed reference genotype  
145 Darmor-*bzh* was found in the divergent semi-winter and spring ecotypes, and in genetically  
146 distant synthetic *B. napus* accessions R53 and No2127 (Figure 2). Unexpectedly, however,  
147 the winter-type accessions Express 617, Tapidor and Quinta also showed high levels of SV  
148 compared to Darmor-*bzh*, despite a related breeding history and partially shared pedigree  
149 (e.g. Express 617). According to (Lu et al., 2019), who used whole-genome resequencing  
150 data to investigate the species origin and evolution of *B. napus*, spring and semi-winter types

151 arose only very recently (<500 years) from winter-types. Our data concur with this  
152 assumption, with fewer genes carrying SV in winter-type accessions (1072) than in spring  
153 (1170) or semi-winter (3663) ecotypes (Figure 1C). Furthermore, we also detected small to  
154 mid-scale SV within each ecotype, for example 1272-1887 genes carrying unique SV events  
155 were found among the four semi-winter accessions (Figure 1D). The unexpectedly high  
156 structural gene diversification both between and within ecotypes suggests that *de novo*  
157 generation of small to mid-scale SV may also be ongoing in recent breeding history. Overall,  
158 4590 of the called intragenic SV were common among the four *B. napus* forms, indicating  
159 putative SV events specific to Darmor-*bzh*. These could possibly be attributed to errors in the  
160 Darmor-*bzh* reference assembly, however the similar number of unique intragenic SV  
161 detected only in semi-winter types (3663) suggests that this frequency is not unexpected in  
162 the context of the other results. Repeating the analysis with the concatenated pseudo-  
163 reference from *B. rapa* plus *B. oleracea* gave comparable results (6248 common among all  
164 sequenced *B. napus* forms, 2919 unique to semi-winter ecotypes).

165 To evaluate the influence of SV on eco-geographical adaptation and potential species  
166 diversification, we constructed a maximum likelihood (ML) tree for the 12 *B. napus* lines  
167 based solely on SV detected using long read sequencing data. The resulting tree (Figure 1B)  
168 comprised 3 divergent clades representing 3 ecotypes of *B. napus* (winter, semi-winter and  
169 spring). In contrast to genetic clustering based on genome-wide SNP data, which reveals high  
170 sequence diversification between synthetic and natural *B. napus* (Bus et al., 2011), the two  
171 synthetic accessions R53 and No2127 did not fall into separate clades. Instead, the winter-  
172 type R53 clustered closest together with the natural winter-type accessions and the spring-  
173 type No2127 clustered with the natural spring-type accessions. This suggests that small to  
174 mid-size SV events originating during or immediately after allopolyploidisation might  
175 rapidly confer ecogeographical adaptation. Although hundreds to thousands of genes carrying  
176 unique SV events were detected in each individual accession, the intriguing observation that  
177 their cumulative clustering reflects ecogeographical adaptation forms suggests a possible key  
178 role of SV in rapid functional adaptation. Overall, the distribution and frequency of SV  
179 events in all investigated accessions suggest that small to mid-scale SV may be a major,  
180 previously unknown source of functional genetic variation in *B. napus*.

181 Unfortunately, a catalogued and validated “truth set” of genomic SV is not yet established for  
182 *B. napus* or other complex plant genomes. This makes it crucial to validate SV predicted  
183 from long reads using independent validation methods. On the other hand, manual  
184 verification of thousands of SV events (for example using PCR) is not realistic. To obtain

185 first insight into the validity of the SV called using our pipeline, we selected relevant,  
186 potentially functional examples representing possible functional mutations in flowering-time  
187 and disease resistance-related genes. We validated the detected SV events using different  
188 independent methods in a total of 4 *B. napus* genotypes including two springs, one winter and  
189 a synthetic.

190

### 191 **Small to mid-scale SV events impact *B. napus* flowering time pathway genes**

192 In order to understand the impact of gene scale re-arrangements on eco-geographical  
193 adaptations in *B. napus*, we examined the abundance of SV in the known *B. napus* orthologs  
194 of all known genes from the *Arabidopsis* flowering-time pathway. Whereas most of these  
195 genes are present in only a single copy in *Arabidopsis*, all have multiple duplicates in *B.*  
196 *napus* (Schiessl et al., 2014). Although many *B. napus* flowering-time gene orthologues are  
197 known to be affected by copy-number variation, the exact positions of copy-number variants  
198 and other small to mid-scale forms of SV could not be determined from previous, short-read  
199 resequencing data (Schiessl et al., 2017). Using long-read data, we found that 44 of 178  
200 flowering-time pathway genes, including numerous key regulatory genes, contain one or  
201 more small to mid-scale insertions or deletions. For example, we detected a 90 bp insertion in  
202 an orthologue of *Vernalisation Insensitive 3* on chromosome C03 (*BnVIN3.C03*,  
203 *BnaC03g12980D*) in 3 out of 12 total genotypes, Express 617, No2127 and Zheyu7 (Figure  
204 3A). Successful validation of this insertion via PCR, using primers designed from the SV-  
205 flanking sequences, is shown in Figure 3B. The same insertion was undetectable using only  
206 the short read sequence-capture data of Schiessl et al. (2017). In two out of three spring  
207 accessions, N99 and PAK85912, we detected a 2.8 kbp insertion in a *B. napus* orthologue of  
208 the key vernalisation regulator *Flowering Locus C* (*BnFLC.A02*, *BnaA02g00370D*), a variant  
209 previously reported by Chen et al. (2018) to be causal for early flowering.

210 In a second case study, we analysed SV events in key vernalisation genes that differentiate  
211 between the vernalisation-dependent and vernalisation-independent *B. napus* accessions in  
212 our panel. A number of interesting, putative functional variants were detected. For example,  
213 we detected a 288 bp deletion (Figure 5) in all the spring and semi-winter accessions (except  
214 for ZS11) in *BnFT.A02* (*BnaA02g12130D*). This *FT* ortholog on chromosome A02 has been  
215 reported to be significantly associated with flowering-time variation in a worldwide  
216 collection of rapeseed accessions (Wu et al., 2019). *BnFT.A02* was also found to be  
217 differentially expressed among winter, spring and semi-winter type *B. napus* by Wu et al.

218 (2019), therefore we scanned for SV in the putative promoter region for this gene. We  
219 identified a 1.3 kbp deletion between 6,365,143 and 6,366,504 bp on chromosome A02,  
220 exclusively present in all 4 spring accessions, which was situated approximately 10kbp  
221 upstream from the start codon of *BnFT.A02* (Figure 5).

222

### 223 **Intragenic SV events associate with disease resistance in oilseed rape**

224 Samans et al. (2017) and Hurgobin et al. (2018) revealed that defence-related R-genes  
225 involved in monogenic resistance are particularly enriched in genome regions affected by  
226 large-scale SV in *B. napus*. In a third case study related to a prominent disease resistance in  
227 oilseed rape, we investigated the impact of SV in resistance-related genes co-localising with  
228 QTL for quantitative disease resistance in a bi-parental cross between the sequenced  
229 accessions Express 617 and R53. These two accessions differ strongly in their resistance  
230 reaction to the important fungal pathogen *Verticillium longisporum* (Obermeier et al., 2013),  
231 and SV detected between the two parental lines were selected for validation based on their  
232 co-localization to resistance-related genes in corresponding resistance QTL (see  
233 Supplementary Methods for selection criteria for PCR validation of SV events). Most  
234 interestingly, we identified a 700 bp deletion in R53 that caused the loss of three exons of a  
235 *4-Coumarate:CoA Ligase (4CL)* gene (*BnaC05g15830D*). In the genetic map from the  
236 Express 617 x R53 mapping population, this gene is located within a major QTL for *V.*  
237 *longisporum* resistance on *B. napus* chromosome C05 (Obermeier et al., 2013). 4CL is a  
238 critical enzyme involved in the phenylpropanoid pathway (Li et al., 2015) and Obermeier et  
239 al. (2013) reported that major QTL for phenylpropanoid compounds co-localized with the  
240 QTL for *V. longisporum* resistance in the Express 617 x R53 mapping population. Locus-  
241 specific PCR primers, spanning the putative SV predicted by the long sequence reads,  
242 amplified 900 bp and 200 bp fragments for Express 617 and R53, respectively (Figure 4 A  
243 and B), confirming the expected 700 bp deletion. Re-screening of the PCR markers for the  
244 700 bp deletion in the doubled haploid mapping population from Express 617 x R53  
245 confirmed their co-localisation with the QTL and a strong effect on resistance of up to  
246  $R^2=19.4\%$ .

247

### 248 **Implications of long-read sequencing technologies for discovery of functional diversity**



249 Of nine additional SV events we evaluated using PCR, all showed the expected PCR products  
250 corresponding to the deletions or insertions predicted by the long-read SV calling. These  
251 results underline the apparent effectiveness of long sequence reads for accurately detecting  
252 and anchoring insertions/deletions in a broad size range from under 100 bp up to multiple  
253 kbp. In contrast, Illumina short reads from regions corresponding to insertions not present in  
254 available reference genomes remain un-aligned in alignment-based resequencing approaches,  
255 meaning that their genomic localization using short-read data can be achieved only by whole  
256 genome *de novo* assembly. Our results in *B. napus* showed that *de novo* SV events appear to  
257 occur at an unexpectedly high rate. Hence, it remains unclear how many high-quality  
258 reference genomes will be necessary to construct a representative pangenome that captures  
259 the majority of the genome-wide functional SV landscape.

260 This study provides one of the very first insights into genome-wide, gene scale SV linked to  
261 important agronomic traits in a major crop species. Recently, Yang et al. (2019) revealed a  
262 similar scale of widespread SV by comparing whole-genome assemblies of two diverse  
263 maize accessions. However, the cost of genome assembly is still much too high to capture the  
264 full extent of species-wide SV in large numbers of genotypes, particularly in species like *B.*  
265 *napus* with dynamic polyploid genomes in which genome rearrangement may even still be  
266 ongoing. Our successful verification of 10 out of 10 SV selected events via PCR  
267 (Supplementary table S8) gives us high confidence that SV predicted using medium-coverage  
268 long-read data with our calling strategy are genuine. This provides a relatively cost-effective  
269 method to assay larger germplasm collections without ascertainment bias.

270 The occurrence of SV events in a size range corresponding to intragenic rearrangements  
271 (~100-1000 nt) has been ignored in most crop species in the past, due to the limited  
272 resolution of short-read resequencing. Although presence-absence calling from genome-wide  
273 SNP array data has been successful in isolated cases in establishing QTL associations (e.g.  
274 Gabur et al., 2018a), SNP-based genome-wide association (GWAS) studies are unable to tag  
275 causative SV in crops and genome regions in which high levels of LD decay surround the SV  
276 events (Zhou et al., 2019). Array-based approaches to call presence absence variations (PAV)  
277 or homoeologous exchanges (e.g. Grandke et al. 2016) are therefore likely to ignore  
278 potentially functional SV events. Reduced costs, considerably improved read accuracy and  
279 significantly increased average read lengths today make long-read sequencing technologies a  
280 viable option not only for accurate assemblies of complex plant genomes (Belser et al.,  
281 2018), but increasingly also for genome-wide resequencing. Our results suggest that simple  
282 reference-based resequencing and alignment with long reads can uncover a new dimension of

283 genetic and genomic diversity associated with important traits in crop plants. Particularly in  
284 polyploid plants (Schiessl et al., 2019), this may lead to discovery of previously unknown  
285 levels of functional diversity of major interest for breeding and crop adaptation.

286

## 287 **Experimental procedures**

### 288 **Plant material**

289 We chose 12 *B. napus* genotypes (Table 1) comprising of 3 winter, 4 semi-winter, 3 spring  
290 and 2 synthetics (one each of winter and spring).

291

### 292 **DNA isolation for Oxford Nanopore Technology (ONT) sequencing**

293 High molecular weight DNA was isolated using DNA isolation protocol modified from  
294 Mayjonade et al. (2016). Young leaves were harvested from rapeseed plants at 4-6 leaf stage  
295 and flash frozen using liquid nitrogen. Frozen leaf material was ground to fine powder using  
296 a mortar and pestle and transferred to 15 ml Falcon tube. 4-5 ml of pre-heated lysis buffer  
297 (1% w/v PVP40, 1% w/v PVP10, 500 mM NaCl, 100mM TRIS pH8, 50 mM EDTA, 1.25%  
298 w/v SDS, 1% (w/v) Na<sub>2</sub>S<sub>2</sub>O<sub>5</sub>, 5mM C<sub>4</sub>H<sub>10</sub>O<sub>2</sub>S<sub>2</sub>, 1 % v/v Triton X-100) was added in order to  
299 disrupt the cell wall. The lysate was incubated for 30 minutes at 37°C in a thermomixer. 0.3  
300 volumes of 5M Potassium Acetate was added to the lysate and spun at 8000g for 12 minutes  
301 at 4°C to precipitates sodium dodecyl sulfate (SDS) and SDS-bound proteins in order to  
302 obtain clean DNA. Finally, magnetic beads were used to recover cleaned DNA.

303

### 304 **Library preparation for ONT sequencing**

305 Between 1-3ug of DNA was used to prepare the sequencing library, using the ligation  
306 sequencing kit SQK-LSK108 or SQK-LSK109 according to the manufacturer's  
307 recommendations. Genomic DNA was subjected to end repair followed by a bead cleanup.  
308 Sequencing adaptors were then ligated to the end-repaired DNA. Finally, the adaptor ligated  
309 DNA was once again subjected to bead cleaning. DNA was finally loaded onto an Oxford  
310 Nanopore MinION flow cell for sequencing.

311

### 312 **Pacific Biosciences (PacBio) sequencing**

313 Raw PacBio reads originating from 8 genotypes (Quinta, Tapidor, No2127, Westar, Gangan,  
314 Shengli, Zheyu7 and ZS11) were downloaded from NCBI short read archive (Accession  
315 number PRJNA546246) with the permission from the authors.

316

### 317 **Bioinformatics analysis**

#### 318 **Alignment and SV calling for ONT data**

319 Raw fast5 files obtained by the MinION device were base-called using ONT provided base-  
320 caller, Albacore. Raw, uncorrected reads from various flow cells were combined into single  
321 fastq file for each genotype. This fastq file was used to align the Nanopore reads to the  
322 publically available *B. napus* reference genome assembly Darmor-bzh v4.1 (Chalhoub et al.,  
323 2014) and also to a concatenated pseudo-reference assembly comprising the *B. rapa* and *B.*  
324 *oleracea* reference assemblies recently published by Belser et al. (2018), using NGMLR  
325 version 0.2.7 (Sedlazeck et al., 2018) with default settings except for “-x ont” flag,  
326 representing parameter presets for ONT. NGMLR produced an un-sorted SAM file as an  
327 output, which was converted to a sorted BAM file using Samtools version 1.9 (Li et al.,  
328 2009). Genomic variants were called using Sniffles version 1.0.10 (Sedlazeck et al., 2018)  
329 using the preset parameters.

330

#### 331 **Alignment and SV calling for PacBio data**

332 Since 8 PacBio libraries contained nearly 70-80 Gbp of sequencing data, we randomly  
333 selected 50 Gbp of data for further analysis in order to obtain quantitatively comparable data  
334 to the Nanopore sequencing. This 50 Gbp of data was then aligned as per section 1.4.1 to the  
335 publicly available *B. napus* reference and also to the concatenated pseudo-reference  
336 assembly, using NGMLR version 0.2.7 with default settings. NGMLR produced an un-sorted  
337 SAM file as an output, which was converted to a sorted BAM file using Samtools version  
338 1.9. Genomic variants were called using Sniffles (version 1.0.10) using the preset parameters.

339

#### 340 **Quality filtering of the predicted SV events for both ONT and PacBio datasets**

341 We performed a very stringent quality filtering on the sniffles predicted SV events. Since the  
342 study was focused on small scale insertions or deletions, we removed all predicted  
343 translocations and duplications. Furthermore, it is nearly impossible to validate the  
344 authenticity of such SV events, as many may represent mis-positioning of genomic fragments  
345 in the reference assembly, we only considered SV scored as “PASS” by Sniffles and ignored  
346 those scored as “UNRESOLVED”. Sniffles reports SVs with both within-alignment (AL) and

347 split-read (SR) information. AL-type SV are usually small indels that can be spanned within a  
348 single alignment, whereas large or complex events lead to SR alignments (Sedlazeck et al.,  
349 2018). To ensure only the high confidence SV were selected, all SV which were not  
350 supported by a “within-alignment: AL” flag were discarded. This might lead to an under-  
351 estimation and bias in the size distribution of the detectable SV. However, at this point of  
352 time the accuracy of publically available genome from *B. napus* is not high enough to  
353 distinguish large and complex SV events from assembly errors.

354

### 355 **Calculation of overlap between SV events and the gene models**

356 Quality filtered SV events were overlapped with the gene models from Darmor-*bzh* and also  
357 to the combined *B. rapa* and *B. oleracea* reference assemblies using Bedtools intersect  
358 (Quinlan and Hall, 2010) using the default parameters. In order to calculate the genome wide  
359 frequency of SV events, we also overlapped the quality filtered SV with a bed file containing  
360 1 Mbp windows for the entire genome assembly. The intersect file between the SV events  
361 and 1 Mbp windows for the entire genome assembly was then used for plotting the SV  
362 distribution along 19 *B. napus* chromosomes, using Circos (Krzywinski et al., 2009).  
363 Statistics including length and distribution of quality-filtered SV from the 12 genotypes were  
364 calculated with SURVIVOR (Jeffares et al., 2017) and plotted with ggplot2 (Wickham,  
365 2016).

366

### 367 **Construction of a Maximum Likelihood (ML) tree**

368 SV events predicted for each of the 12 genotypes were merged into a single variant calling  
369 file (vcf). This combined vcf was then used to force call all the SV events across all 12  
370 genotypes using Sniffles, resulting in a multi-sample vcf. The multi-sample vcf was then  
371 converted into PHYLIP format using an in house bash script and used as an input for IQ-  
372 TREE version 1.6.12 (Nguyen et al., 2015). The best-fit substitution model for the data was  
373 determined by IQ-TREE ModelFinder (Kalyaanamoorthy et al., 2017) and used to construct a  
374 phylogenetic tree. The tree was then plotted with FigTree  
375 (<http://tree.bio.ed.ac.uk/software/figtree/>).

376

### 377 **Selection of SV events for PCR validation**

378 We looked at two different agronomically interesting traits in order to prioritize the predicted  
379 SV events. Firstly, we analyzed the SV events that might contribute to *Verticillium*  
380 *longisporum* (VL) resistance, using a bi-parental double-haploid population derived from a

381 cross between our sequencing panel genotypes Express 617 and R53. Two QTL were defined  
382 for VL resistance on chromosome C01 and C05 by Obermeier et al. (2013). We mainly  
383 focused on C05 QTL, as this was described to be the major genetic control for VL resistance.  
384 The genetic map used for identifying C05 QTL was based on SSR (Simple Sequence  
385 Repeats) and AFLP (Amplified Fragment Length Polymorphism) markers. Therefore, in  
386 order to localize the physical position of the QTL on chromosome C05, we anchored the  
387 flanking SSR markers (BRMS030\_210 and Na12C01\_160) to the Darmor-*bzh* version 4.1  
388 assembly and identified a 4.3 Mbp (6,329,426 bp to 10,659,726 bp) region containing 606  
389 genes. 37 and 45 out of the 606 genes were found to contain SV in the form of insertions or  
390 deletions in Express 617 and R53 respectively. 17 genes were found to be common among  
391 both the genotypes, so were dropped from the prioritized gene set. We further prioritized the  
392 candidate genes, if they were annotated as defense response or phenolpropanoid pathway  
393 genes. Secondly, we analyzed the SV located within the genes described to be involved in  
394 flowering time pathway in *B. napus* as described by Schiessl et al. (2017). Top prioritized SV  
395 were then visualized in IGV viewer (Robinson et al., 2017) and selected for PCR validation.

396

#### 397 **Conflict of interest**

398 The authors declare no conflicts of interest.

399

#### 400 **Authorship**

401 HSC, HTL and RJS conceived the study. HSC, STNA and IAPP generated the Oxford  
402 Nanopore long-read sequence data. JS, KL and LG contributed PacBio long-read sequence  
403 data. SVS contributed Illumina sequence capture data. HSC, STNA and HTL conducted the  
404 experiments and analysed the data. IG, CO, RJS and HTL provided ideas and suggestions for  
405 data analysis. HSC and RS drafted the manuscript.

## References

- Belser, C., Istace, B., Denis, E., Dubarry, M., Baurens, F.-C., Falentin, C., Genete, M., Berrabah, W., Chèvre, A.-M., Delourme, R., Deniot, G., Denoeud, F., Duffé, P., Engelen, S., Lemainque, A., Manzanares-Dauleux, M., Martin, G., Morice, J., Noel, B., Vekemans, X., D'Hont, A., Rousseau-Gueutin, M., Barbe, V., Cruaud, C., Wincker, P. and Aury, J.-M. (2018) Chromosome-scale assemblies of plant genomes using nanopore long reads and optical maps. *Nat Plants* **4**, 879–887.
- Bus, A., Körber, N., Snowdon, R. J. and Stich, B. (2011) Patterns of molecular variation in a species-wide germplasm set of *Brassica napus*. *Theor. Appl. Genet.* **123**, 1413–1423.
- Chalhoub, B., Denoeud, F., Liu, S., Parkin, I. A. P., Tang, H., Wang, X., Chiquet, J., Belcram, H., Tong, C., Samans, B., Correa, M., Da Silva, C., Just, J., Falentin, C., Koh, C. S., Le Clainche, I., Bernard, M., Bento, P., Noel, B., Labadie, K., Alberti, A., Charles, M., Arnaud, D., Guo, H., Daviaud, C., Alamery, S., Jabbari, K., Zhao, M., Edger, P. P., Chelaifa, H., Tack, D., Lassalle, G., Mestiri, I., Schnel, N., Le Paslier, M.-C., Fan, G., Renault, V., Bayer, P. E., Golicz, A. A., Manoli, S., Lee, T.-H., Thi, V. H. D., Chalabi, S., Hu, Q., Fan, C., Tollenaere, R., Lu, Y., Battail, C., Shen, J., Sidebottom, C. H. D., Canaguier, A., Chauveau, A., Berard, A., Deniot, G., Guan, M., Liu, Z., Sun, F., Lim, Y. P., Lyons, E., Town, C. D., Bancroft, I., Meng, J., Ma, J., Pires, J. C., King, G. J., Brunel, D., Delourme, R., Renard, M., Aury, J.-M., Adams, K. L., Batley, J., Snowdon, R. J., Tost, J., Edwards, D., Zhou, Y., Hua, W., Sharpe, A. G., Paterson, A. H., Guan, C. and Wincker, P. (2014) Early allopolyploid evolution in the post-Neolithic *Brassica napus* oilseed genome. *Science* **345**, 950–953.
- Chen, L., Dong, F., Cai, J., Xin, Q., Fang, C., Liu, L., Wan, L., Yang, G. and Hong, D. (2018) A 2.833-kb insertion in *BnFLC.A2* and its homeologous exchange with *BnFLC.C2* during breeding selection generated early-flowering rapeseed. *Mol Plant* **11**, 222–225.
- Gabur, I., Chawla, H. S., Liu, X., Kumar, V., Faure, S., Tiedemann, A. von, Jestin, C., Dryzka, E., Volkmann, S., Breuer, F., Delourme, R., Snowdon, R. and Obermeier, C. (2018) Finding invisible quantitative trait loci with missing data. *Plant Biotechnol J* **16**, 2102–2112.
- Gabur, I., Chawla, H. S., Snowdon, R. J. and Parkin, I. A. P. (2019) Connecting genome structural variation with complex traits in crop plants. *Theor. Appl. Genet.* **132**, 733–750.
- Grandke, F., Snowdon, R. and Samans, B. (2016) gsrc: an R package for genome structure rearrangement calling. *Bioinformatics* **33**, 545–546.
- He, Z., Wang, L., Harper, A. L., Havlickova, L., Pradhan, A. K., Parkin, I. A. P. and Bancroft, I. (2017) Extensive homoeologous genome exchanges in allopolyploid crops revealed by mRNAseq-based visualization. *Plant Biotechnol J* **15**, 594–604.
- Hurgobin, B., Golicz, A. A., Bayer, P. E., Chan, C.-K. K., Tirnaz, S., Dolatabadian, A., Schiessl, S. V., Samans, B., Montenegro, J. D., Parkin, I. A. P., Pires, J. C., Chalhoub, B., King, G. J., Snowdon, R., Batley, J. and Edwards, D. (2018) Homoeologous exchange is a major cause of gene presence/absence variation in the amphidiploid *Brassica napus*. *Plant Biotechnol J* **16**, 1265–1274.
- Jeffares, D. C., Jolly, C., Hoti, M., Speed, D., Shaw, L., Rallis, C., Balloux, F., Dessimoz, C., Bähler, J. and Sedlazeck, F. J. (2017) Transient structural variations have strong effects on quantitative traits and reproductive isolation in fission yeast. *Nat Commun* **8**, 14061.

- Kalyaanamoorthy, S., Minh, B. Q., Wong, T. K. F., Haeseler, A. von and Jermin, L. S. (2017) ModelFinder: fast model selection for accurate phylogenetic estimates. *Nat. Methods* **14**, 587–589.
- Krzywinski, M., Schein, J., Birol, I., Connors, J., Gascoyne, R., Horsman, D., Jones, S. J. and Marra, M. A. (2009) Circos: an information aesthetic for comparative genomics. *Genome research* **19**, 1639–1645.
- Leflon, M., Eber, F., Letanneur, J. C., Chelysheva, L., Coriton, O., Huteau, V., Ryder, C. D., Barker, G., Jenczewski, E. and Chèvre, A. M. (2006) Pairing and recombination at meiosis of *Brassica rapa* (AA) x *Brassica napus* (AACC) hybrids. *Theor. Appl. Genet.* **113**, 1467–1480.
- Li, H., Handsaker, B., Wysoker, A., Fennell, T., Ruan, J., Homer, N., Marth, G., Abecasis, G. and Durbin, R. (2009) The Sequence Alignment/Map format and SAMtools. *Bioinformatics* **25**, 2078–2079.
- Li, Y., Im Kim, J., Pysh, L. and Chapple, C. (2015) Four isoforms of Arabidopsis 4-Coumarate:CoA Ligase have overlapping yet distinct roles in phenylpropanoid metabolism. *Plant Physiol.* **169**, 2409–2421.
- Liu, L., Stein, A., Wittkop, B., Sarvari, P., Li, J., Yan, X., Dreyer, F., Frauen, M., Friedt, W. and Snowdon, R. J. (2012) A knockout mutation in the lignin biosynthesis gene *CCR1* explains a major QTL for acid detergent lignin content in *Brassica napus* seeds. *Theor. Appl. Genet.* **124**, 1573–1586.
- Lu, K., Wei, L., Li, X., Wang, Y., Wu, J., Liu, M., Zhang, C., Chen, Z., Xiao, Z., Jian, H., Cheng, F., Zhang, K., Du, H., Cheng, X., Qu, C., Qian, W., Liu, L., Wang, R., Zou, Q., Ying, J., Xu, X., Mei, J., Liang, Y., Chai, Y.-R., Tang, Z., Wan, H., Ni, Y., He, Y., Lin, N., Fan, Y., Sun, W., Li, N.-N., Zhou, G., Zheng, H., Wang, X., Paterson, A. H. and Li, J. (2019) Whole-genome resequencing reveals *Brassica napus* origin and genetic loci involved in its improvement. *Nat Commun* **10**, 1154.
- Mahmoud, M., Gobet, N., Cruz-Dávalos, D. I., Mounier, N., Dessimoz, C. and Sedlazeck, F. J. (2019) Structural variant calling: the long and the short of it. *Genome Biol.* **20**, 246.
- Mayjonade, B., Gouzy, J., Donnadiou, C., Pouilly, N., Marande, W., Callot, C., Langlade, N. and Muñoz, S. (2016) Extraction of high-molecular-weight genomic DNA for long-read sequencing of single molecules. *BioTechniques* **61**, 203–205.
- Nguyen, L.-T., Schmidt, H. A., Haeseler, A. von and Minh, B. Q. (2015) IQ-TREE: a fast and effective stochastic algorithm for estimating maximum-likelihood phylogenies. *Mol. Biol. Evol.* **32**, 268–274.
- Nicolas, S. D., Le Mignon, G., Eber, F., Coriton, O., Monod, H., Clouet, V., Huteau, V., Lohanlen, A., Delourme, R., Chalhoub, B., Ryder, C. D., Chèvre, A. M. and Jenczewski, E. (2007) Homeologous recombination plays a major role in chromosome rearrangements that occur during meiosis of *Brassica napus* haploids. *Genetics* **175**, 487–503.
- Nicolas, S. D., Leflon, M., Liu, Z., Eber, F., Chelysheva, L., Coriton, O., Chèvre, A. M. and Jenczewski, E. (2008) Chromosome 'speed dating' during meiosis of polyploid *Brassica* hybrids and haploids. *Cytogenet. Genome. Res.* **120**, 331–338.
- Obermeier, C., Hossain, M. A., Snowdon, R., Knüfer, J., Tiedemann, A. von and Friedt, W. (2013) Genetic analysis of phenylpropanoid metabolites associated with resistance against *Verticillium longisporum* in *Brassica napus*. *Mol. Breed.* **31**, 347–361.
- Qian, L., Voss-Fels, K., Cui, Y., Jan, H. U., Samans, B., Obermeier, C., Qian, W. and Snowdon, R. J. (2016) Deletion of a Stay-Green Gene Associates with Adaptive Selection in *Brassica napus*. *Mol Plant* **9**, 1559–1569.
- Quinlan, A. R. and Hall, I. M. (2010) BEDTools: a flexible suite of utilities for comparing genomic features. *Bioinformatics* **26**, 841–842.

- Robinson, J. T., Thorvaldsdóttir, H., Wenger, A. M., Zehir, A. and Mesirov, J. P. (2017) Variant Review with the Integrative Genomics Viewer. *Cancer Res.* **77**, e31-e34.
- Samans, B., Chalhoub, B. and Snowdon, R. J. (2017) Surviving a Genome Collision: Genomic Signatures of Allopolyploidization in the Recent Crop Species *Brassica napus*. *The Plant Genome* **10**.
- Schiessl, S., Huettel, B., Kuehn, D., Reinhardt, R. and Snowdon, R. J. (2017) Targeted deep sequencing of flowering regulators in *Brassica napus* reveals extensive copy number variation. *Sci Data* **4**.
- Schiessl, S., Samans, B., Hüttel, B., Reinhard, R. and Snowdon, R. J. (2014) Capturing sequence variation among flowering-time regulatory gene homologs in the allopolyploid crop species *Brassica napus*. *Front Plant Sci* **5**, 404.
- Schiessl, S.-V., Katche, E., Ihien, E., Chawla, H. S. and Mason, A. S. (2019) The role of genomic structural variation in the genetic improvement of polyploid crops. *The Crop Journal* **7**, 127–140.
- Sedlazeck, F. J., Rescheneder, P., Smolka, M., Fang, H., Nattestad, M., Haeseler, A. von and Schatz, M. C. (2018) Accurate detection of complex structural variations using single-molecule sequencing. *Nat. Methods* **15**, 461–468.
- Song, J.-M., Guan, Z., Hu, J., Guo, C., Yang, Z., Wang, S., Liu, D., wang, B., Lu, S., Zhou, R., Xie, W.-Z., Cheng, Y., Zhang, Y., Liu, K., Yang, Q.-Y., Chen, L.-L. and Guo, L. (2020) Eight high-quality genomes reveal pan-genome architecture and ecotype differentiation of *Brassica napus*. *Nat Plants* **6**, 34–45.
- Stein, A., Coriton, O., Rousseau-Gueutin, M., Samans, B., Schiessl, S. V., Obermeier, C., Parkin, I. A. P., Chèvre, A.-M. and Snowdon, R. J. (2017) Mapping of homoeologous chromosome exchanges influencing quantitative trait variation in *Brassica napus*. *Plant Biotechnol J* **15**, 1478–1489.
- Szadkowski, E., Eber, F., Huteau, V., Lodé, M., Huneau, C., Belcram, H., Coriton, O., Manzanares-Dauleux, M. J., Delourme, R., King, G. J., Chalhoub, B., Jenczewski, E. and Chèvre, A.-M. (2010) The first meiosis of resynthesized *Brassica napus*, a genome blender. *New Phytol.* **186**, 102–112.
- Wickham, H. (2016). *ggplot2*. Cham: Springer International Publishing.
- Wu, D., Liang, Z., Yan, T., Xu, Y., Xuan, L., Tang, J., Zhou, G., Lohwasser, U., Hua, S., Wang, H., Chen, X., Wang, Q., Le Zhu, Maodzeka, A., Hussain, N., Li, Z., Li, X., Shamsi, I. H., Jilani, G., Wu, L., Zheng, H., Zhang, G., Chalhoub, B., Shen, L., Yu, H. and Jiang, L. (2019) Whole-Genome Resequencing of a Worldwide Collection of Rapeseed Accessions Reveals the Genetic Basis of Ecotype Divergence. *Mol Plant* **12**, 30–43.
- Zhou, Y., Minio, A., Massonnet, M., Solares, E., Lv, Y., Beridze, T., Cantu, D. and Gaut, B. S. (2019) The population genetics of structural variants in grapevine domestication. *Nat Plants* **5**, 965–979.



**Table 1:** Number and size distributions of SV detected in 12 *B. napus* genotypes. ONT: Oxford Nanopore Technologies; PacBio: Pacific Biosciences; SV: Structural variant.

| <b>Genotype</b>    | <b>Data type</b> | <b>Ecotype</b>      | <b>N50 for raw reads</b> | <b>Quality filtered SV</b> | <b>Intra-genic SV</b> | <b>Minimum size of SV</b> | <b>Maximum size of SV</b> | <b>Median size SV</b> |
|--------------------|------------------|---------------------|--------------------------|----------------------------|-----------------------|---------------------------|---------------------------|-----------------------|
| <b>Express 617</b> | ONT              | Winter              | 10,756                   | 27,107                     | 5,383                 | 31                        | 16,931                    | 341                   |
| <b>Quinta</b>      | Pacbio           | Winter              | 14,192                   | 32,349                     | 7,286                 | 31                        | 15,869                    | 353                   |
| <b>Tapidor</b>     | Pacbio           | Winter              | 14,448                   | 32,757                     | 7,479                 | 31                        | 15,289                    | 344                   |
| <b>ZS11</b>        | Pacbio           | Semi-winter         | 10,552                   | 37,496                     | 9,165                 | 31                        | 11,312                    | 281                   |
| <b>Zheyu7</b>      | Pacbio           | Semi-winter         | 12,370                   | 38,590                     | 9,226                 | 31                        | 17,001                    | 305                   |
| <b>Gangan</b>      | Pacbio           | Semi-winter         | 14,064                   | 35,560                     | 8,542                 | 31                        | 14,264                    | 335                   |
| <b>Shengli</b>     | Pacbio           | Semi-winter         | 13,828                   | 39,622                     | 9,697                 | 31                        | 12,207                    | 321                   |
| <b>PAK85912</b>    | ONT              | Spring              | 28,916                   | 23,177                     | 5,172                 | 31                        | 28,777                    | 584                   |
| <b>N99</b>         | ONT              | Spring              | 27,139                   | 34,848                     | 7,700                 | 31                        | 26,183                    | 509                   |
| <b>Westar</b>      | Pacbio           | Spring              | 13,810                   | 37,138                     | 8,769                 | 31                        | 17,615                    | 332                   |
| <b>R53</b>         | ONT              | Winter<br>synthetic | 11,253                   | 33,851                     | 7,929                 | 31                        | 12,635                    | 296                   |
| <b>No2127</b>      | Pacbio           | Spring<br>synthetic | 15,369                   | 44,516                     | 10,869                | 31                        | 15,565                    | 304                   |

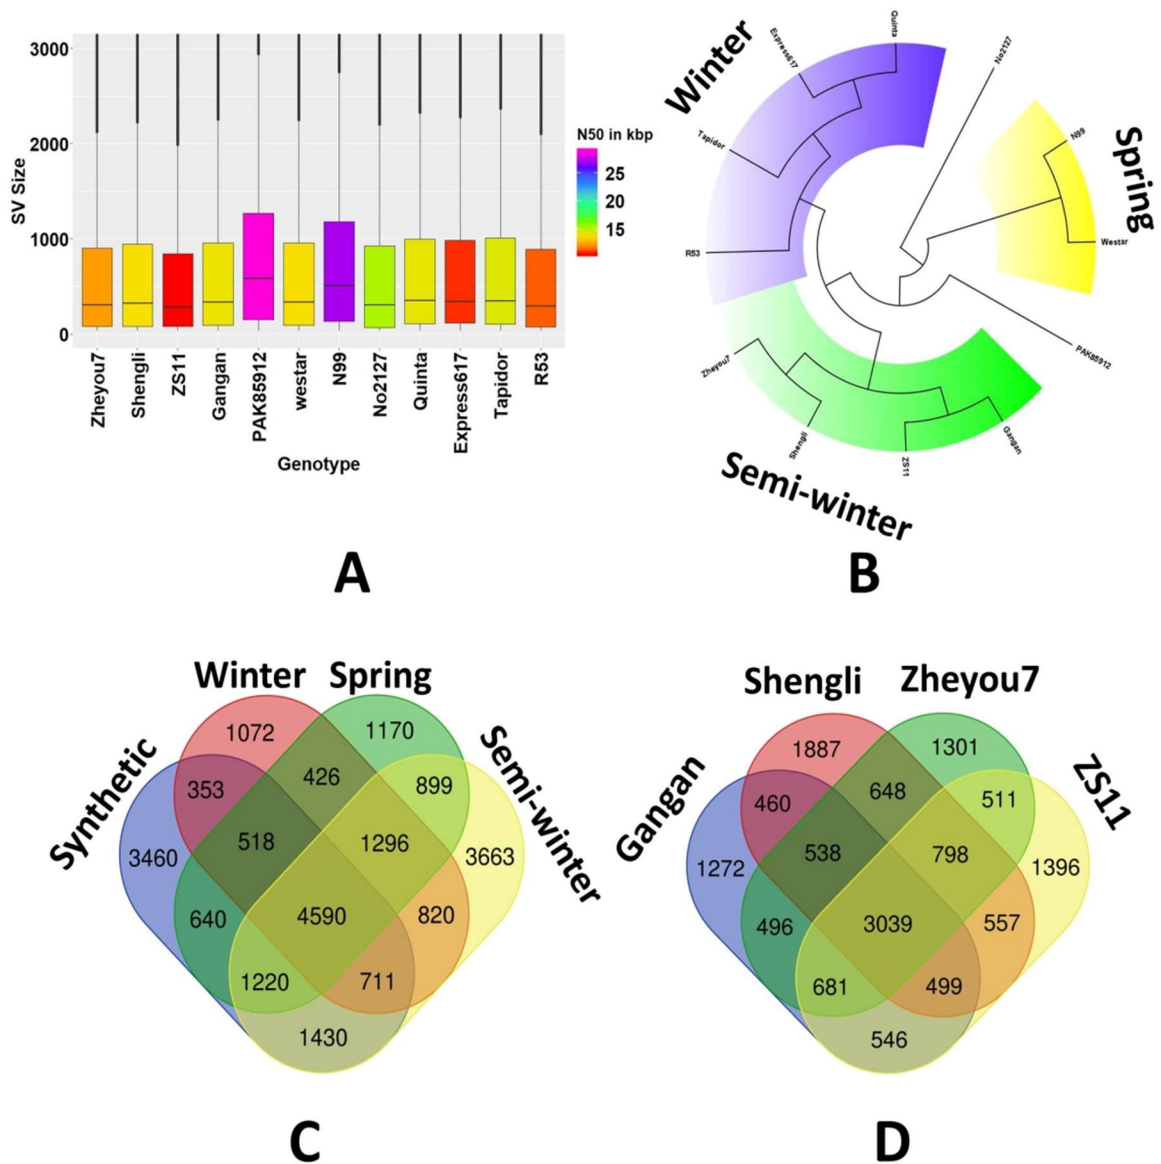

**Figure 1:** **A.** Box plots showing size distributions of SV events detected in 12 *B. napus* genotypes. **B.** Maximum likelihood tree showing genetic relationships among 12 *B. napus* genotypes based solely on genome-wide SV events, revealing clear clustering into the appropriate ecogeographical morphotype groups. **C.** Venn diagram showing the numbers of common or unique genes carrying intragenic SV events across three divergent ecotypes and synthetic *B. napus*, respectively. **D.** Venn diagram representing the numbers of common or unique genes carrying intragenic SV events across 4 semi-winter *B. napus* accessions.

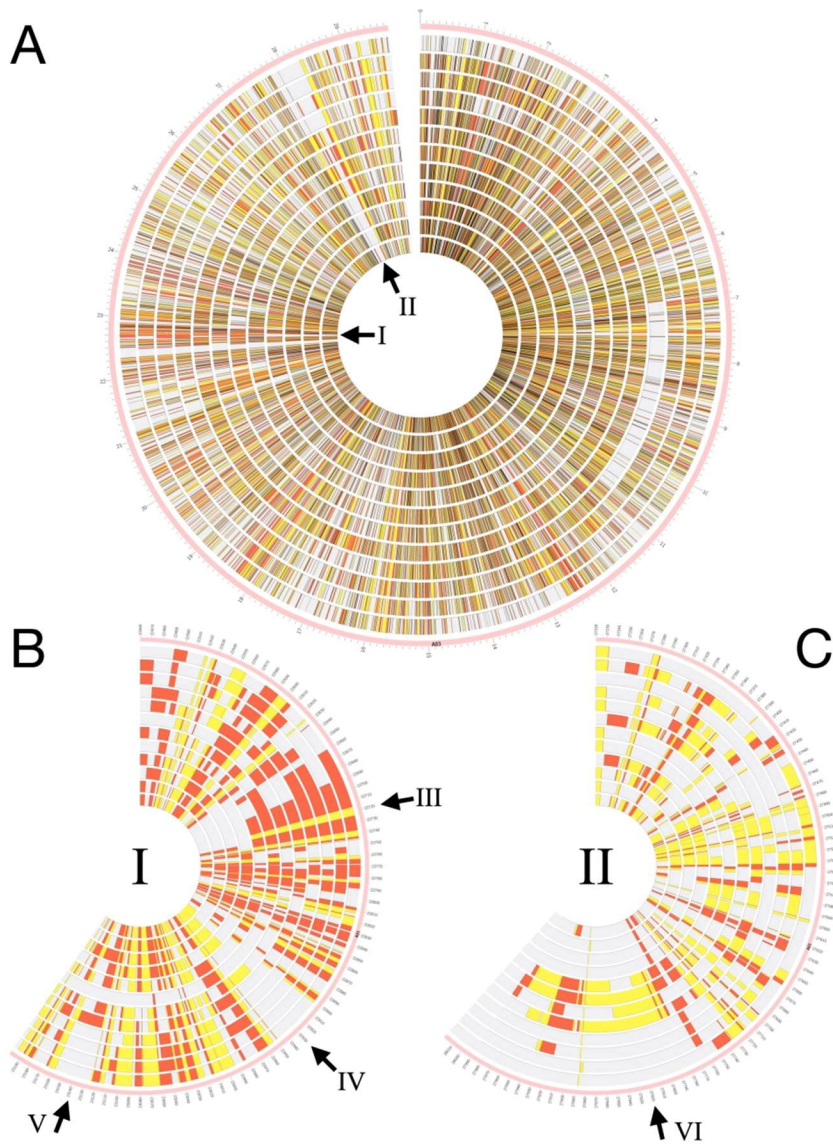

**Figure 2.** **A:** Circos plot showing small to mid-scale insertion and deletion events in 12 *B. napus* accessions, using chromosome A03 as an example. Each track represents a single accession in the following order from outside to inside: Express 617, Quinta, Tapidor, R53 (all winter-type), No2127, N99, Westar, PAK85912 (spring-type), Gangan, Shengli, Zheyong7 and ZS11 (semi-winter type). Deletions are represented by yellow blocks, whereas insertions are shown by red blocks. Darker blocks in (A) represent regions containing both deletions and insertions in different genotypes. Arrows I and II mark selected segmental SV events specific for a particular ecotype. **B:** Expanded view of the chromosome segment depicted by arrow I in A. Arrow III represents a 50 kbp region containing segmental deletion and insertion events detected in all winter and spring ecotypes but not in the semi-winter-types. Arrow IV indicates a 40 kbp region containing segmental deletions detected only in the four semi-winter types and three of spring-types. Arrow V indicates a 40 kbp region containing segmental insertions detected only in the four semi-winter types and one of the spring-types. **C.** Expanded view of the chromosome segment depicted by arrow II in A. Arrow VI indicates a 120 kbp region containing segmental insertions only in the four spring-types

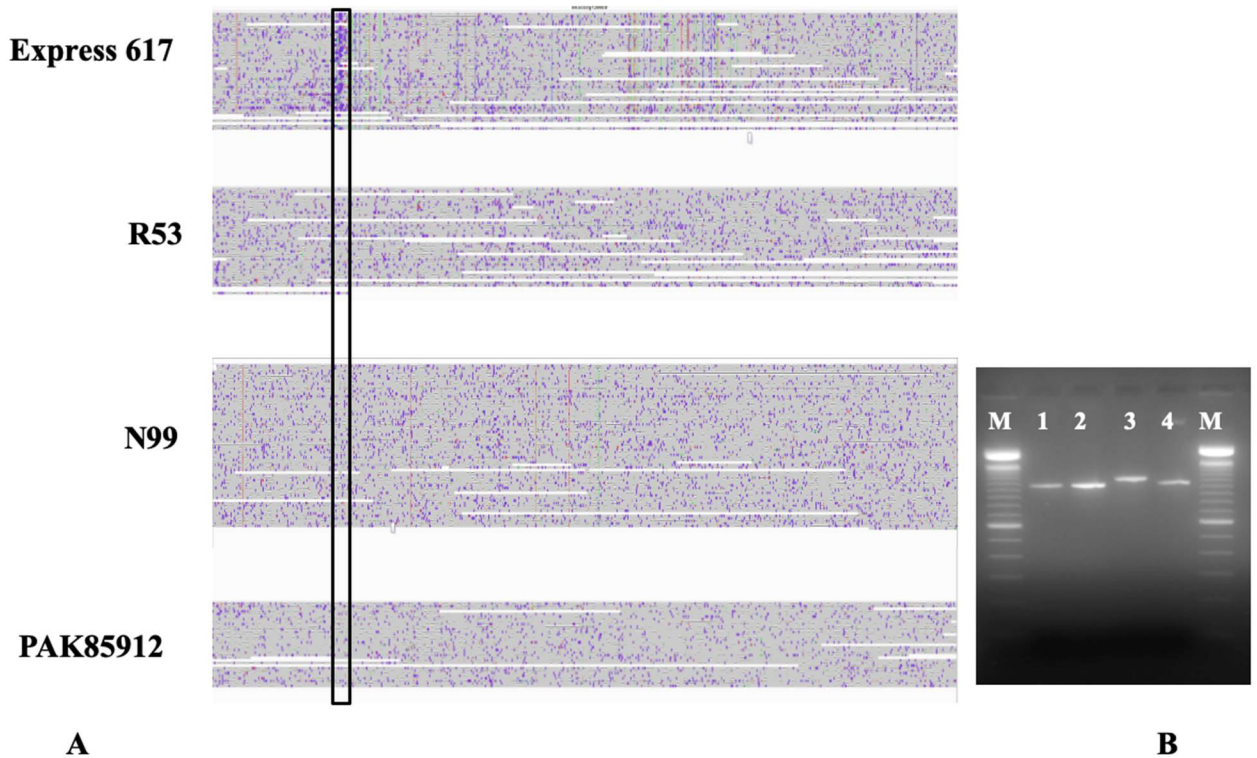

**Figure 3:** **A.** 90 bp insertion (highlighted in the black box) in an orthologue of *Vernalisation Insensitive 3* on chromosome C03 (*BnVIN3.C03*) revealed by aligning ONT reads from 4 different genotypes to the Darmor-*bzh* reference version 4.1 (detected only in Express 617). **B.** Agarose gel image of PCR product from the same insertion. M represents a 100 bp ladder and 1-4 represent PCR product originating from N99, PAK85912, Express 617 and R53 respectively. As expected Express 617 exhibits a PCR product size of 1090 bp whereas a 1000 bp product is observed for the rest of three genotypes.

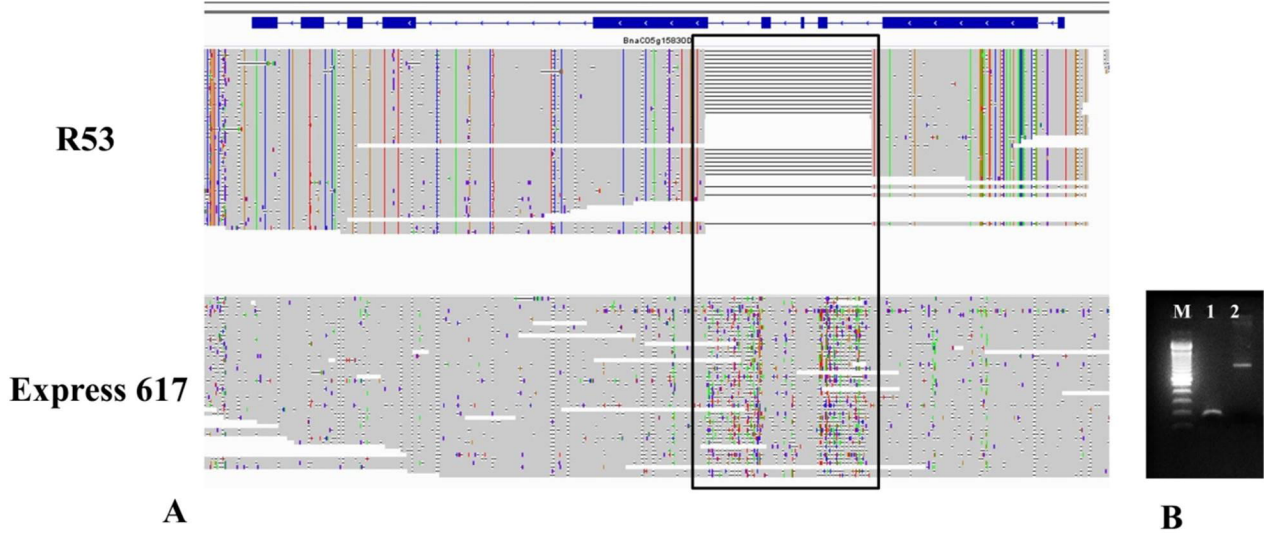

**Figure 4:** **A.** 700 bp deletion (highlighted in the black box) in R53 that caused the loss of three exons of a *4-Coumarate:CoA Ligase (4CL)* gene (*BnaC05g15830D*). **B.** Agarose gel image of PCR product from the same deletion. M represents a 100 bp ladder and 1,2 represent PCR product originating from R53 and Express 617 respectively. As expected Express 617 exhibits a PCR product size of 900 bp whereas R53 shows a band at 200 bp

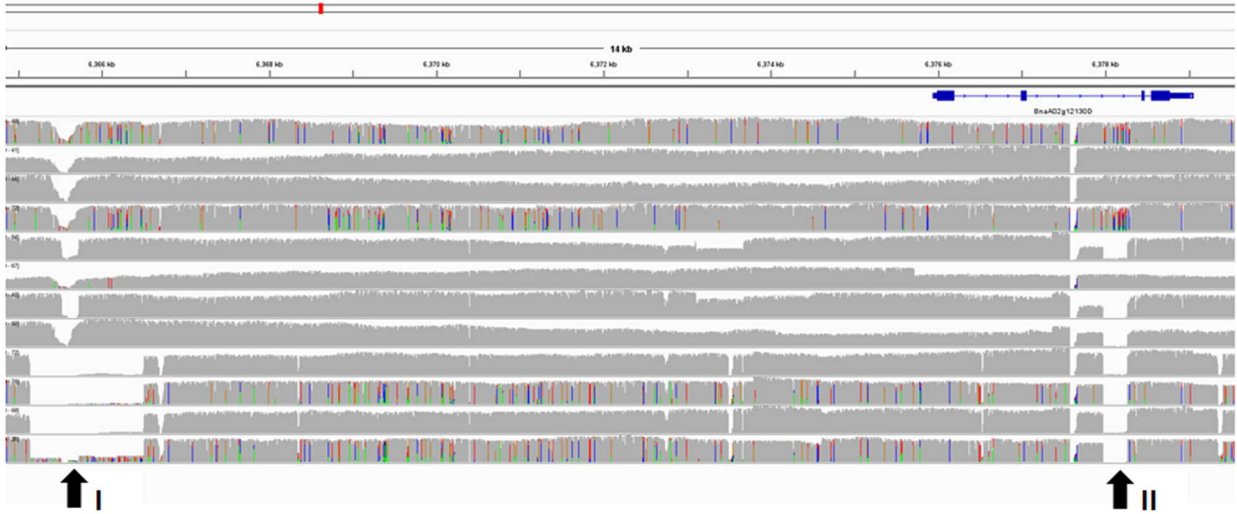

**Figure 5:** Each track represents a single genotype in the following order from top to bottom: Express 617, Tapidor, Quinta, R53, Shengli, ZS11, Gangan, Zheyu7, No2127, N99, Westar and PAK85912. Arrow I indicate a 1.3 kbp deletion in putative promoter region in *BnFT.A02* (*BnaA02g12130D*) for all 4 spring accessions (No2127, N99, Westar and PAK85912). Arrow II indicates a 288 bp deletion in all the spring and semi-winter accessions (except for ZS11) in *BnFT.A02*.

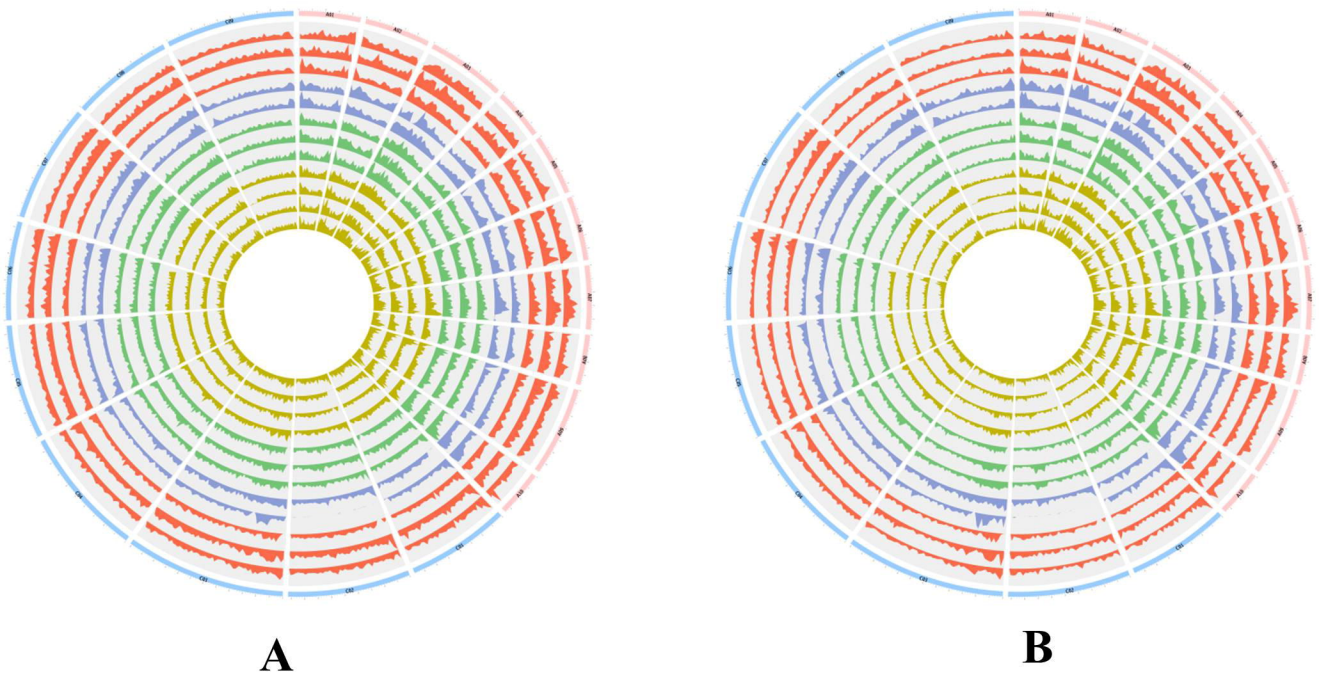

**Figure 6: A.** Circos plot depicting number of small to mid-scale deletion events calculated in 1 Mbp windows across 19 chromosomes of 12 *B. napus* accessions. Each track represents a single genotype in the following order from outside to inside: Express 617, Quinta, Tapidor, R53, No2127, N99, Westar, PAK85912, Gangan, Shengli, Zheyu7 and ZS11. Colours of tracks represent different types of *B. napus*. The red, blue, green and yellow track colours represent winter-type, synthetic, spring-type and semi-winter accessions, respectively. **B.** Circos plot depicting the frequency of small to mid-scale insertion events in 1 Mbp windows across 19 chromosomes of 12 *B. napus* genotypes. Each track represents a single genotype in the following order from outside to inside: Express 617, Quinta, Tapidor, R53, No2127, N99, Westar, PAK85912, Gangan, Shengli, Zheyu7 and ZS11. Colours of tracks represent different types of *B. napus*. The red, blue, green and yellow track colours represent winter-type, synthetic, spring-type and semi-winter accessions respectively.
